# Supplementary material for: Adsorption dynamics of thermoresponsive microgels with incorporated short oligo(ethylene glycol) chains at the oil–water interface
Source: Royal Society of Chemistry journal article supplement (doi:10.1039/d1sm00146a), 2021-01-01
Supplement: d1sm00146a1.pdf [file d1sm00146a1.pdf]

## Electronic Supplementary Information (ESI)

### **Adsorption dynamics of thermoresponsive microgels with incorporated short oligo(ethylene glycol) chains at the oil-water interface**

Abhijit Dan,<sup>a\*</sup> Priyanshi Agnihotri,<sup>a</sup> Steffen Bochenek<sup>b</sup> and Walter Richtering<sup>b</sup>

<sup>a</sup> Department of Chemistry and Centre for Advanced Studies in Chemistry, Panjab University  
– Chandigarh, Sector 14, Chandigarh 160014, India

<sup>b</sup> Institute of Physical Chemistry, RWTH Aachen University, Landoltweg 2, 52056 Aachen,  
Germany, European Union

Corresponding author

\*Email: abhijit@pu.ac.in (A. Dan)

**Table S1** Reaction Compositions for the Synthesis of Microgels\*

| Microgel                       | Code         | NIPAM:<br>BIS:<br>OEGMA<br>(mol%) | NIPAM (g) | BIS (g) | OEGMA (g) |
|--------------------------------|--------------|-----------------------------------|-----------|---------|-----------|
| PNIPAM                         | $MG^5$       | 95: 5: 0                          | 1.630     | 0.117   | 0         |
| PNIPAM-co-MEMA                 | $MG_{M10}^5$ | 85: 5: 10                         | 1.461     | 0.117   | 0.218     |
| PNIPAM-co-DEGMA                | $MG_{D10}^5$ | 85: 5: 10                         | 1.461     | 0.117   | 0.285     |
| PNIPAM-co-PEGMA <sub>300</sub> | $MG_{P10}^5$ | 85: 5: 10                         | 1.461     | 0.117   | 0.455     |

\*The superscripts and subscripts in the microgel codes represent the amount of crosslinker and comonomer in mol%, respectively added during the synthesis with M = MEMA, D = DEGMA and P = PEGMA<sub>300</sub>.

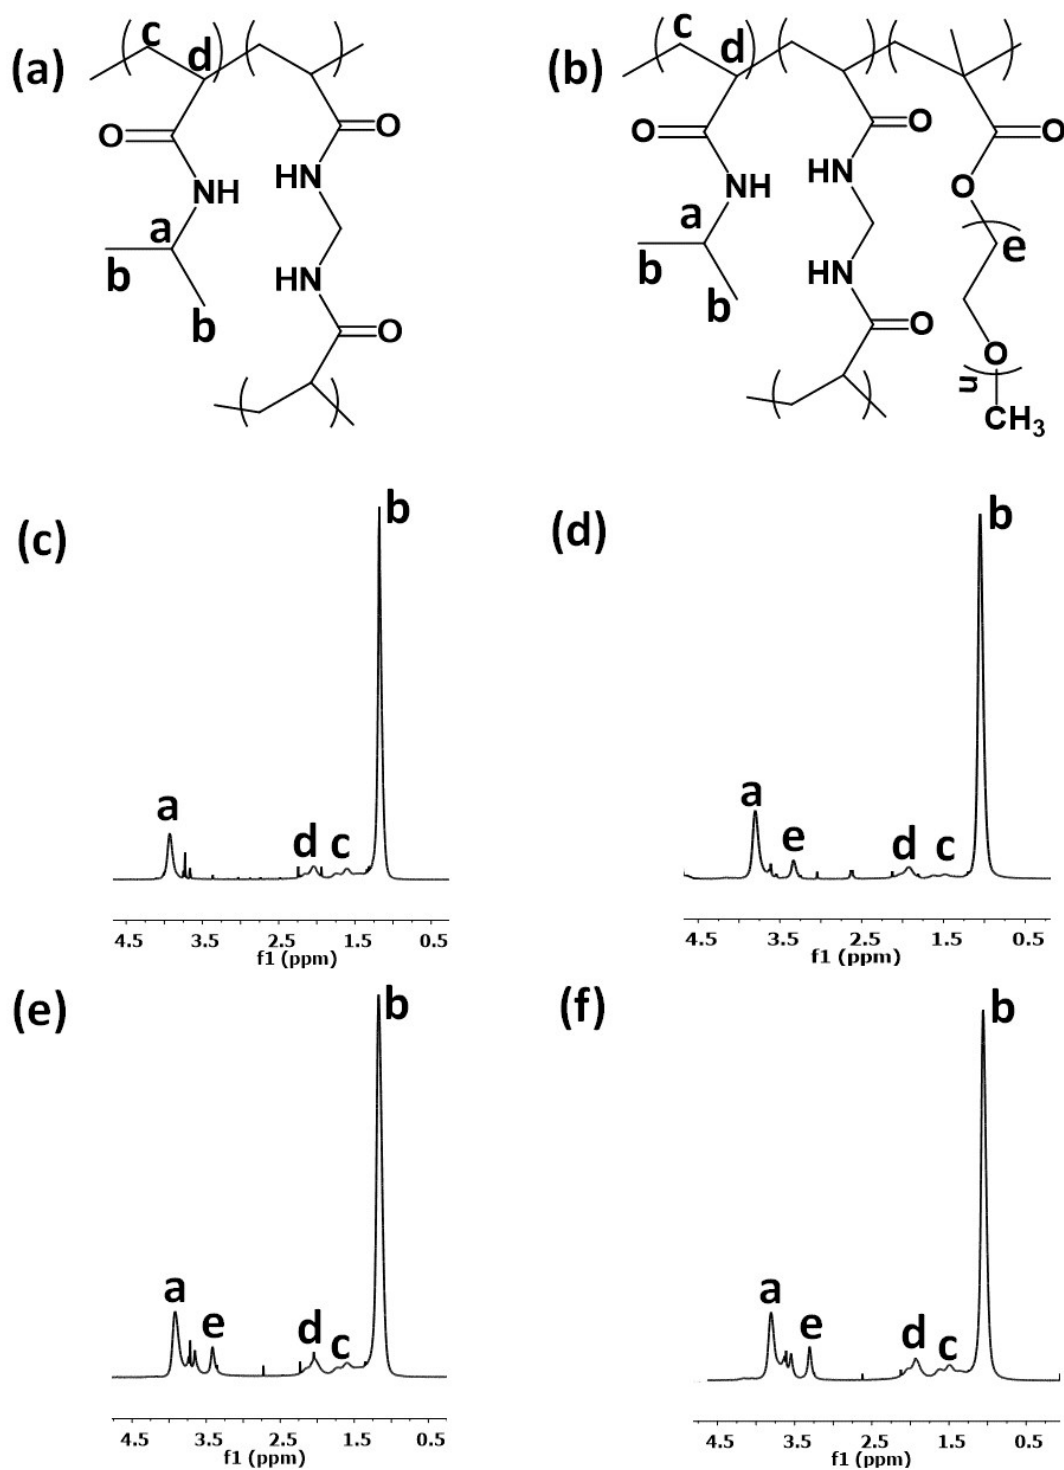

**Fig. S1** Structure of (a) PNIPAM (b) functional PNIPAM microgels.  $^1\text{H}$ -NMR spectra along with proton assignments for (c) pure PNIPAM, (d) PNIPAM-co-MEMA, (e) PNIPAM-co-DEGMA and (f) PNIPAM-co-PEGMA<sub>300</sub> microgels.

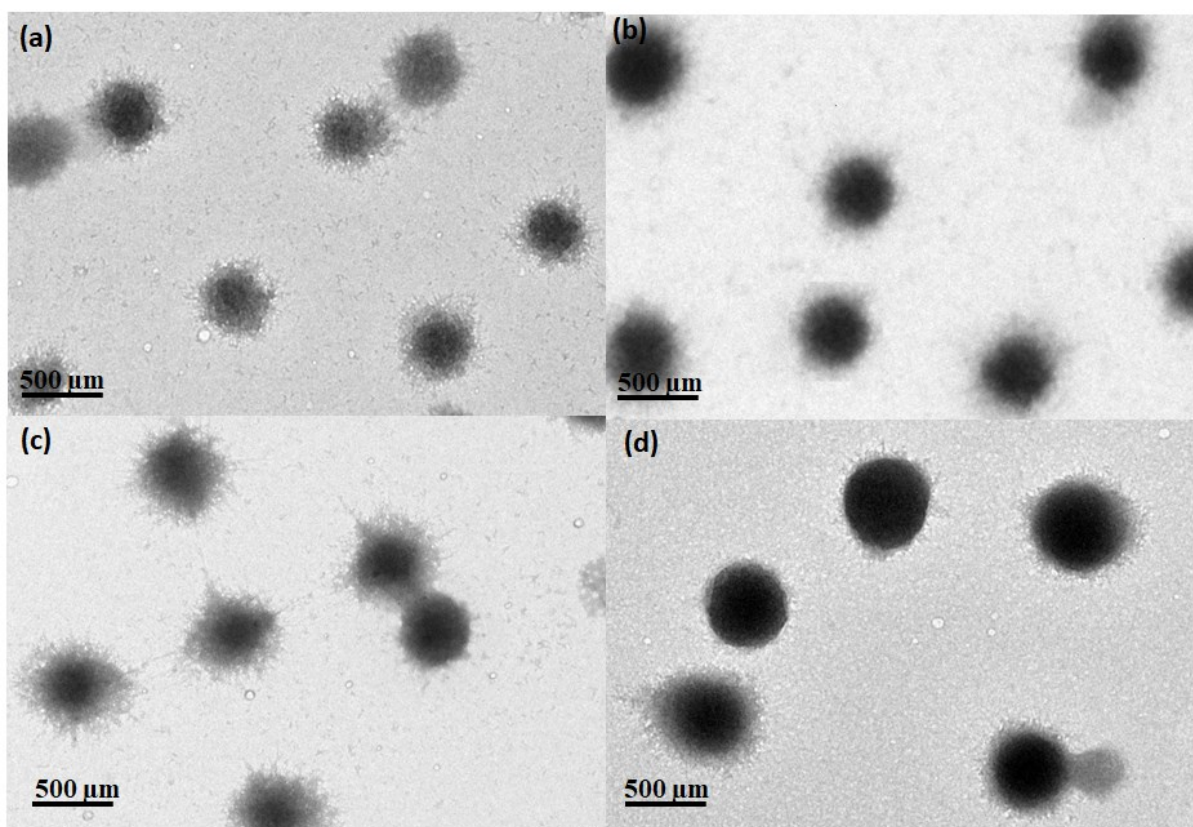

**Fig. S2** TEM images of (a) pure PNIPAM, (b) PNIPAM-co-MEMA, (c) PNIPAM-co-DEGMA and (d) PNIPAM-co-PEGMA<sub>300</sub> microgels.

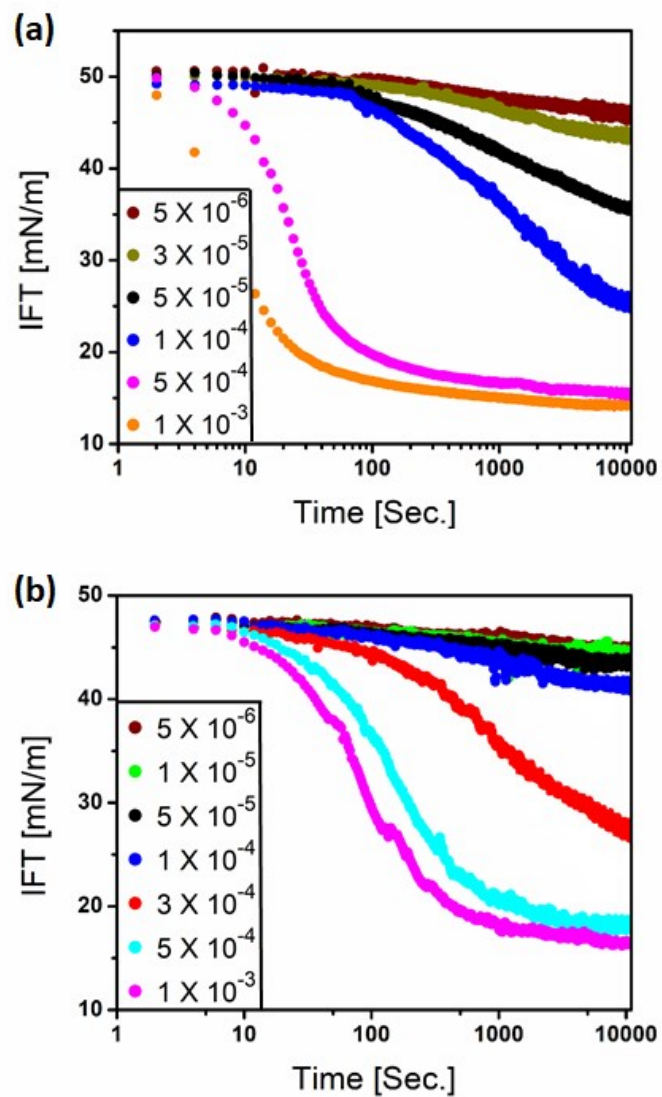

**Fig. S3** Interfacial tension (IFT) of the dodecane-water interface as a function of time for the adsorption of pure PNIPAM microgels at different concentrations measured at (a) 298 and (b) 313 K. The values in the legends represent microgel concentrations in g/ml.

### Determination of number concentration of microgels

The number concentrations of microgels are determined with the help of viscosity data reported in our previous work.<sup>1</sup> The relative viscosity ( $\eta_{rel}$ ) of dilute microgel dispersions were measured at 298 K as a function of mass concentration using an Ubbelohde viscometer (clearance time of 320 s for 15 mL of water) immersed in a temperature-controlled water bath (accuracy  $\pm 0.1$  K). The value of  $\eta_{rel}$  is related to the effective volume fraction ( $\Phi_{eff}$ ) via Batchelor equation as follows.

$$\eta_{rel} = 1 + 2.5\Phi_{eff} + 5.9\Phi_{eff}^2 \quad (S1)$$

$$\text{Here, } \Phi_{eff} = kc \quad (S2)$$

where,  $k$  is a shift factor for converting the mass concentration to effective volume fraction and  $c$  is the concentration of microgel dispersion in wt%.

The  $k$  values are obtained from the fitting of measured  $\eta_{rel}$  data with eqn. (S1) as shown in Fig. S4. These values are  $8.5 \times 10^{-2}$ ,  $11.5 \times 10^{-2}$ ,  $12.1 \times 10^{-2}$  and  $13.9 \times 10^{-2}$  for PNIPAM, PNIPAM-co-MEMA, PNIPAM-co-DEGMA and PNIPAM-co-PEGMA<sub>300</sub> microgels, respectively. Then, mass of single microgel particle ( $m_p$ ) is determined using the following equation.<sup>2</sup>

$$m_p = \frac{V_p \rho_{solvent}}{k} \quad (S3)$$

$$\text{with } V_p = \frac{4}{3}\pi R_h^3 \quad (S4)$$

where,  $V_p$  is the volume of microgels,  $\rho_{solvent}$  is the density of solvent and  $R_h$  is the hydrodynamic radius of microgels.

In order to estimate the mass of single microgel particle, an assumption on the microgel density in the swollen state has to be made. Further, it is assumed the density of the swollen microgel be equal to the solvent density.<sup>3,4</sup> The  $R_h$  values are obtained using DLS measurements. We then use the value of  $m_p$  to calculate the number concentration of microgels ( $N_i$ ) in each sample

with  $N_i = m_i/m_{p,i}$  where,  $m_{p,i}$  and  $m_i$  are the polymer mass per microgel and the total polymer mass of the  $i$ th sample used, respectively. Note that the microgels undergo a shrinkage at temperatures above the volume phase transition temperature, while the number concentrations remain unaltered.

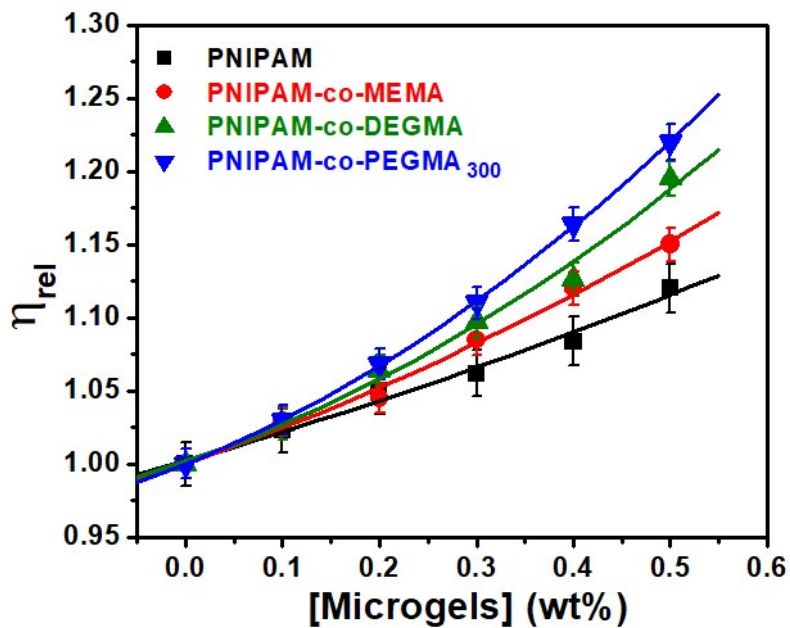

**Fig. S4** Relative viscosity as a function of mass concentration of PNIPAM, PNIPAM-co-MEMA, PNIPAM-co-DEGMA and PNIPAM-co-PEGMA<sub>300</sub> microgels measured at 298 K. The symbols represent experimental data, the lines represent model fits of Batchelor equation.

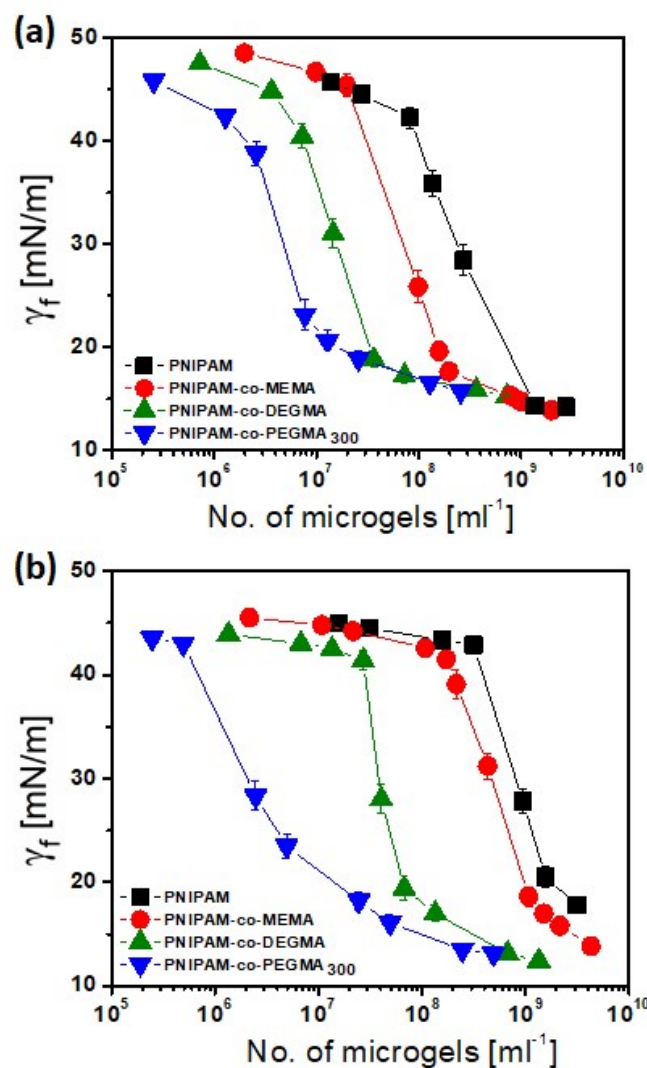

**Fig. S5** Evolution of the final interfacial tension ( $\gamma_f$ ) as a function of number concentration of pure PNIPAM, PNIPAM-co-MEMA, PNIPAM-co-DEGMA and PNIPAM-co-PEGMA<sub>300</sub> microgels measured at (a) 298 K and (b) 313 K. The  $\gamma_m$  values are obtained at 10,000 s period of time.



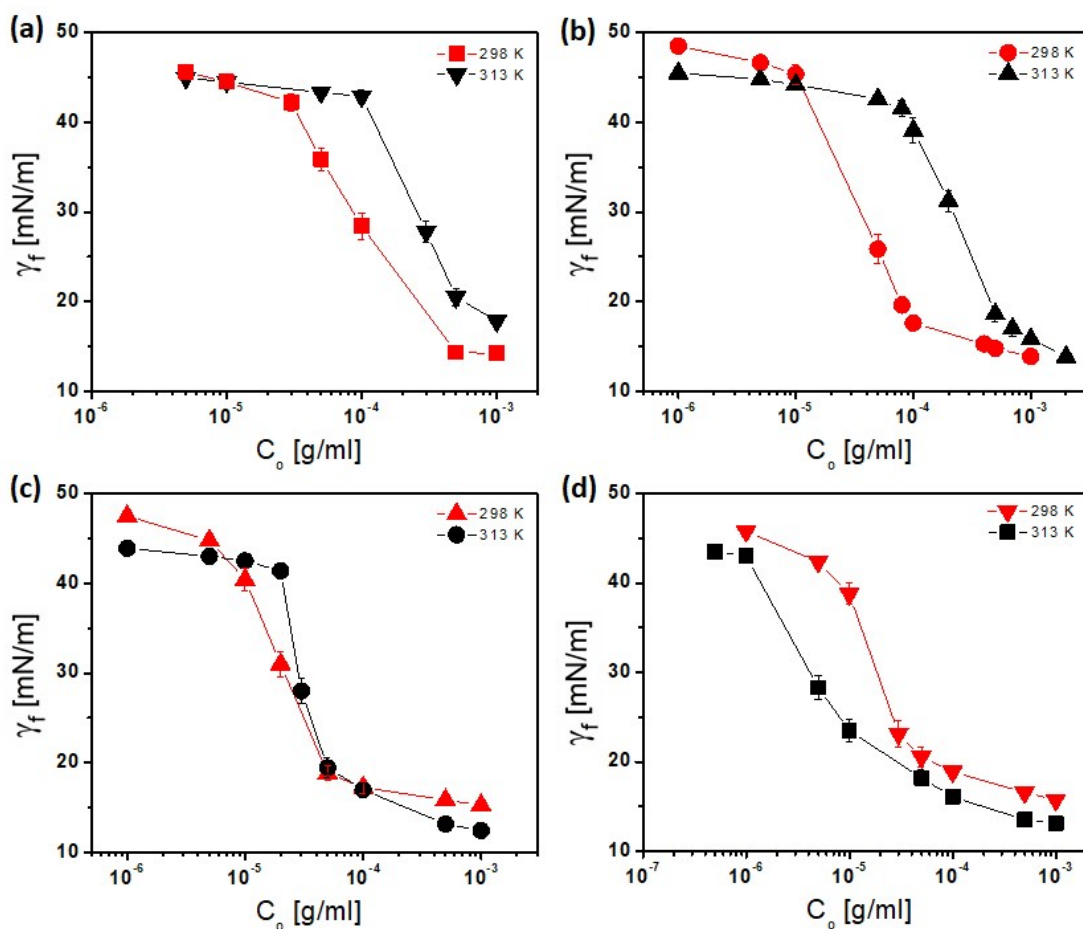

**Fig. S6** Evolution of the final interfacial tension ( $\gamma_f$ ) as a function of microgel concentration for (a) pure PNIPAM, (b) PNIPAM-co-MEMA, (c) PNIPAM-co-DEGMA and (d) PNIPAM-co-PEGMA<sub>300</sub> microgels at two different temperatures. The  $\gamma_m$  values are obtained at 10,000 s period of time.

**Table S2** The values of  $k_i$  and  $R^2$  obtained from Fig. 5 by adopting eqn. (6) at 298 K.

|                                |                            |                    |                    |                    |                    |
|--------------------------------|----------------------------|--------------------|--------------------|--------------------|--------------------|
| PNIPAM-co-MEMA                 | Concentration (g/ml)       | $5 \times 10^{-5}$ | $1 \times 10^{-4}$ | $4 \times 10^{-4}$ | $5 \times 10^{-4}$ |
|                                | $k_i$ ( $s^{-1/2}$ , mN/m) | 0.1072             | 1.1047             | 4.0984             | 5.5838             |
|                                | $R^2$                      | 0.9871             | 0.9817             | 0.9904             | 0.9803             |
| PNIPAM-co-DEGMA                | Concentration (g/ml)       | $2 \times 10^{-5}$ | $5 \times 10^{-5}$ | $1 \times 10^{-4}$ | $5 \times 10^{-4}$ |
|                                | $k_i$ ( $s^{-1/2}$ , mN/m) | 0.115              | 0.3011             | 1.4385             | 5.5945             |
|                                | $R^2$                      | 0.9921             | 0.9878             | 0.9911             | 0.9939             |
| PNIPAM-co-PEGMA <sub>300</sub> | Concentration (g/ml)       | $1 \times 10^{-5}$ | $5 \times 10^{-5}$ | $1 \times 10^{-4}$ | $5 \times 10^{-4}$ |
|                                | $k_i$ ( $s^{-1/2}$ , mN/m) | 0.09               | 0.5726             | 1.2365             | 5.5433             |
|                                | $R^2$                      | 0.9887             | 0.9844             | 0.986              | 0.9852             |

**Table S3** The values of  $k_i$  and  $R^2$  obtained from Fig. 6 by adopting eqn. (6) at 313 K.

|                                |                            |                    |                    |                    |                    |
|--------------------------------|----------------------------|--------------------|--------------------|--------------------|--------------------|
| PNIPAM-co-MEMA                 | Concentration (g/ml)       | $5 \times 10^{-5}$ | $7 \times 10^{-4}$ | $1 \times 10^{-3}$ | $2 \times 10^{-3}$ |
|                                | $k_i$ ( $s^{-1/2}$ , mN/m) | 0.0621             | 0.9273             | 1.7617             | 3.1593             |
|                                | $R^2$                      | 0.9848             | 0.9811             | 0.9895             | 0.9886             |
| PNIPAM-co-DEGMA                | Concentration (g/ml)       | $2 \times 10^{-5}$ | $5 \times 10^{-5}$ | $1 \times 10^{-4}$ | $5 \times 10^{-4}$ |
|                                | $k_i$ ( $s^{-1/2}$ , mN/m) | 0.0478             | 0.2082             | 0.731              | 4.2975             |
|                                | $R^2$                      | 0.9912             | 0.9856             | 0.9873             | 0.9917             |
| PNIPAM-co-PEGMA <sub>300</sub> | Concentration (g/ml)       | $1 \times 10^{-5}$ | $5 \times 10^{-5}$ | $1 \times 10^{-4}$ | $5 \times 10^{-4}$ |
|                                | $k_i$ ( $s^{-1/2}$ , mN/m) | 0.3221             | 0.8705             | 1.9072             | 6.198              |
|                                | $R^2$                      | 0.9811             | 0.9759             | 0.9847             | 0.9875             |

## References

1. P. Agnihotri, R. Raj, D. Kumar and A. Dan, *Soft Matter*, 2020, **16**, 7845–7859.
2. A. Scotti, U. Gasser, E. S. Herman, J. Han, A. Menzel, L. A. Lyon, and A. Fernandez-Nieves, *Phys. Rev. E*, 2017, **96**, 032609.
3. A. Scotti, U. Gasser, E. S. Herman, M. Pelaez-Fernandez, J. Han, A. Menzel, L. A. Lyon, and A. Fernández-Nieves, *Proc. Natl. Acad. Sci. U. S. A.*, 2016, **113**, 5576–5581.
4. G. Romeo, L. Imperiali, J.-W. Kim, A. Fernández-Nieves, and D. A. Weitz, *J. Chem. Phys.*, 2012, **136**, 124905.
